# Supplementary material for: ATX1-Generated H3K4me3 Is Required for Efficient Elongation of Transcription, Not Initiation, at ATX1-Regulated Genes
Source: PubMed Central journal article supplement (PMC3527332; doi:10.1371/journal.pgen.1003111), 2012-12-20
Supplement: pgen.1003111.s003.pdf [file pgen.1003111.s003.pdf]

## Ding et al., Figure S3 Identification of AtWDR5 interacting protein bands by MS

### S3A: ATX1-120 kD

1 MACFSNETQI EIDVHDLVEA PIRYDSIESI YSIPSSALCC VNAVGSLSLM  
51 SKKVKAQKLP MIEQFEIEGS GVSASDDCCR SDDYKLRIQR PEIVRVYYRR  
101 RKRPLRECLL DQAVAVKTES VELDEIDCFE EKKRRKIGNC ELVKSGMESI  
151 GLRRCKENNA FSGNK**QNGSS** **RRKGSSSKNQ** DKATLASRSA KKWVRLSYDG  
201 VDPTSFIGLQ CKVFWPLDAL WYEGSIVGYS AERKRYTVKY RDGCDEDIVF  
251 DREMIKFLVS REEMELLHLK FCTSNVTVDG RDYDEMVLVA ATLDECQDFE  
301 PGDIVWAKLA GHAMWPAVIV DESIIGERKG LNNK**VSGGGS** **LLVQFFGTHD**  
351 **FARIK**VKQAI SFIKGLLSPS HLKCKQPRFE EGMQEAKMYL KAHRLPERMS  
401 QLQKGADSVD SDMANSTEEG NSGGDLLNDG EVWLRPTEHV DFR**HIIGDLL**  
451 **IINLGKVVTD** **SQFFK**DENHI WPEGYTAMRK **FTSLTDHSAS** **ALYKMEVLRD**  
501 AETK**THPLFI** **VTADSGEQFK** **GPTPSACWNK** IYNRIKKVQN **SDSPNILGEE**  
551 **LNGSGTDMFG** **LSNPEVIKLV** **QDLSKSRPSS** HVSMCKNSLG RHQNQPTGYR  
601 PVRVDWKDLD KCNVCHEMDEE YENNLFLQCD KCRMMVHAKC YGELEPCDGA  
651 LWLCNLCRPG APDMPPRCCL CPVVGAMKP TTDGRWAHLA CAIWIPETCL  
701 SDVKKMEPID GVNKVKSDRW KLMCTICGVS YGACIQCSNN SCRVAHYHPLC  
751 ARAAGLCVEL ENDMSVEGEE ADQCIRMLSF CKRHRQTSTA CLGSEDRIKS  
801 ATHKTSEYLP PPNPSGCART EPYNCFGRRG RKEPEALAAA SSKRLFVENQ  
851 PYVIGGYSRL EFSTYKSIHG SKVSQMNTPS NILSMAEKYR YMRETYRKRL  
901 AFGKSGIHGF GIFAKLPHRA GDMMIEYTGE LVRPSIADKR EQLIYNSMVG  
951 AGTYMFRIDD ERVIDATRTG SIAHLINHSC VPNCYSRVIT **VNGDEHIIIF**  
1001 **AKRHIPKWE**E LTYDYRFFSI GERLSCSCGF PGCRCVVNDT EAEEQHAKIC  
1051 VPRCDLIDWT AE

### S3B: ATX1-72 kD (DAST-PHD-SET)

441 DFR**HIIGDLL**  
451 **IINLGKVVTD** **SQFFK**DENHI WPEGYTAMRK **FTSLTDHSAS** **ALYKMEVLRD**  
501 **AETKTHPLFI** **VTADSGEQFK** **GPTPSACWNK** IYNRIKKVQN **SDSPNILGEE**  
551 **LNGSGTDMFG** **LSNPEVIKLV** **QDLSKSRPSS** HVSMCKNSLG RHQNQPTGYR  
601 **PVRVDWKDLD** KCNVCHEMDEE YENNLFLQCD KCRMMVHAKC YGELEPCDGA  
651 LWLCNLCRPG APDMPPRCCL CPVVGAMKP TTDGRWAHLA CAIWIPETCL  
701 SDVKKMEPID GVNKVKSDRW KLMCTICGVS YGACIQCSNN SCRVAHYHPLC  
751 ARAAGLCVEL ENDMSVEGEE ADQCIRMLSF CKRHRQTSTA CLGSEDRIKS  
801 ATHK**TSEYLP** **PPNPSGCART** EPYNCFGRRG **RKEPEALAAA** **SSKRLFVENQ**  
851 **PYVIGGYSRL** **EFSTYKSIHG** SKVSQMNTPS **NILSMAEKYR** YMRETYRKRL  
901 AFGKSGIHGF **GIFAKLPHRA** **GDMMIEYTGE** **LVRPSIADKR** **EQLIYNSMVG**  
951 **AGTYMFRIDD** **ERVIDATRTG** **SIAHLINHSC** **VPNCYSRVIT** **VNGDEHIIIF**  
1001 **AKRHIPKWE**E LTYDYRFFSI GERLSCSCGF PGCRCVVNDT EAEEQHAKIC  
1051 VPRCDLIDWT **AE**

### S3C: ATX1-28 kD (Win+SET)

810 ATHK**TSEYLP** **PPNPSGCART** **EPYNCFGRRG** **RKEPEALAAA** **SSKRLFVENQ**  
851 **PYVIGGYSRL** EFSTYKSIHG SKVSQMNTPS **NILSMAEKYR** YMRETYRKRL  
901 AFGKSGIHGF GIFAKLPHRA GDMMIEYTGE LVRPSIADKR EQLIYNSMVG  
951 AGTYMFRIDD ERVIDATRTG SIAHLINHSC VPNCYSRVIT VNGDEHIIIF

1001 AKRHIPK**WEE** **LTYDYRFFSI** **GERLSCSCGF** **PGCRG**VVNDT EAEEQHAKIC  
1051 VPRCDLIDWT AE

### S3D

Query PPLNPHGS**ARA**EVHLRKSADFDMFNFLASKHRQPPE  
PP NP G AR E +N+L + R+ PE  
Sbjct PPPNPSGC**ARTEP**-----YNCFGRRGRKEPE
