# Supplementary material for: ATX1-Generated H3K4me3 Is Required for Efficient Elongation of Transcription, Not Initiation, at ATX1-Regulated Genes
Source: PubMed Central journal article supplement (PMC3527332; doi:10.1371/journal.pgen.1003111), 2012-12-20

Ding et al. Figure S4

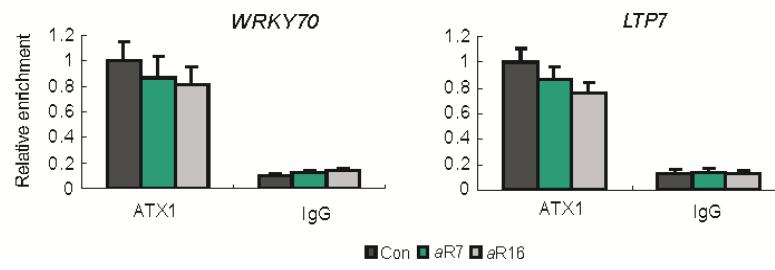

Supplement: pgen.1003111.s004.pdf [file pgen.1003111.s004.pdf]
