# Supplementary material for: ATX1-Generated H3K4me3 Is Required for Efficient Elongation of Transcription, Not Initiation, at ATX1-Regulated Genes
Source: PubMed Central journal article supplement (PMC3527332; doi:10.1371/journal.pgen.1003111), 2012-12-20
Supplement: pgen.1003111.s006.pdf [file pgen.1003111.s006.pdf]

**SUPPLEMENTARY TABLE 1:** Primers used for the various cloning and analytical procedures.

| <b>Pimer</b>              | <b>5'-3' Sequence</b>     | <b>Purpose</b>                   |
|---------------------------|---------------------------|----------------------------------|
| <i>WRKY70</i> Forward     | AGGAGATGGGTTCGAAGGTA      | <i>WRKY70</i> RT-PCR             |
| <i>WRKY70</i> Reverse     | TCGTTGAAGGCCATGACTTA      | <i>WRKY70</i> RT-PCR             |
| <i>LTP7</i> Forward       | ATCACAGCAAAGGCGGETCTGAGC  | <i>LTP7</i> RT-PCR               |
| <i>LTP7</i> Reverse       | TACGTGTTGCACTTGGTGTGTAACC | <i>LTP7</i> RT-PCR               |
| <i>UBQ10</i> Forward      | AGGATGGCAGAACTCTTGCT      | <i>UBQ10</i> T-PCR               |
| <i>UBQ10</i> Reverse      | TCCCAGTCAACGTCTTAACG      | <i>UBQ10</i> RT-PCR              |
| <i>18S</i> Forward        | TCCTAGTAAGCGCGAGTCATCA    | <i>18S</i> Nuclear run on PCR    |
| <i>18S</i> Reverse        | CGAACACTTCACCGGATCAT      | <i>18S</i> Nuclear run on PCR    |
| <i>WRKY70</i> Forward     | AGGAGATGGGTTCGAAGGTA      | <i>WRKY70</i> Nuclear run on PCR |
| <i>WRKY70</i> Reverse     | TCGTTGAAGGCCATGACTTA      | <i>WRKY70</i> Nuclear run on PCR |
| <i>LTP7</i> Forward       | ATCACAGCAAAGGCGGETCTGAGC  | <i>LTP7</i> Nuclear run on PCR   |
| <i>LTP7</i> Reverse       | TACGTGTTGCACTTGGTGTGTAACC | <i>LTP7</i> Nuclear run on PCR   |
| <i>WRKY70</i> region 1 FD | AGATTTGTAATGATGGGCACTTT   | <i>WRKY70</i> ChIP -PCR          |
| <i>WRKY70</i> region 1 RE | TCCATCTCATTTCCTCACACA     | <i>WRKY70</i> ChIP -PCR          |
| <i>WRKY70</i> region 2 FD | AGGAGATGGGTTCGAAGGTA      | <i>WRKY70</i> ChIP -PCR          |
| <i>WRKY70</i> region 2 RE | TCGTTGAAGGCCATGACTTA      | <i>WRKY70</i> ChIP -PCR          |
| <i>WRKY70</i> region 3 FD | CTTCAAACCTGCCGTCGTTA      | <i>WRKY70</i> ChIP -PCR          |
| <i>WRKY70</i> region 3 RE | ATCTCCTCCTCCTCATCCCT      | <i>WRKY70</i> ChIP -PCR          |
| <i>WRKY70</i> region 4 FD | TTTGTCATATTTCCCTCCAAGA    | <i>WRKY70</i> ChIP -PCR          |
| <i>WRKY70</i> region 4 RE | AGCTTTGGTTGCAAGAATCA      | <i>WRKY70</i> ChIP -PCR          |
| <i>WRKY70</i> region 5 FD | CACAAGTCTTGCTCTTGGA       | <i>WRKY70</i> ChIP -PCR          |
| <i>WRKY70</i> region 5 RE | GCAACAAAGCAAGTCCAGAA      | <i>WRKY70</i> ChIP -PCR          |
| <i>WRKY70</i> region 6 FD | TCGCTAAACTCGAAATCGC       | <i>WRKY70</i> ChIP -PCR          |
| <i>WRKY70</i> region 6 RE | CCAGTTACGTCAATGGGAAA      | <i>WRKY70</i> ChIP -PCR          |
| <i>LTP7</i> region 1 FD   | TGACCATTGTCTGTTGTCCGT     | <i>LTP7</i> ChIP -PCR            |

|                            |                                       |                           |
|----------------------------|---------------------------------------|---------------------------|
| <i>LTP7</i> region 1 RE    | TGCGTATGAAATTACGGTGAAACTC             | <i>LTP7</i> ChIP -PCR     |
| <i>LTP7</i> region 2 FD    | ATCACAGCAAAGGCGGCTCTGAGCT             | <i>LTP7</i> ChIP -PCR     |
| <i>LTP7</i> region 2 RE    | TACGTGTTGCACTTGGTGTGAACC              | <i>LTP7</i> ChIP -PCR     |
| <i>LTP7</i> region 3 FD    | CAAGCATGTTCGTTGCATAAA                 | <i>LTP7</i> ChIP -PCR     |
| <i>LTP7</i> region 3 RE    | GTTGCACTTGGTGTGAACC                   | <i>LTP7</i> ChIP -PCR     |
| <i>Actin7</i> FD           | CGTTTCGCTTTCCTTAGTGTTAGCT             | <i>Actin7</i> ChIP -PCR   |
| <i>Actin7</i> RE           | AGCGAACGGATCTAGAGACTCACCTTG           | <i>Actin7</i> ChIP -PCR   |
| <i>WDR5</i> Forward        | AGagatctCTATGGCAGAGGAAATTCCAGCAACA    | <i>pGBDT7-WDR5</i>        |
| <i>WDR5</i> Reverse        | GCagatctTTATTCTTTCTTCTGTGTCCAAATCCT   | <i>pGBDT7-WDR5</i>        |
| <i>ATX1</i> Forward        | ATAccgggGATGGCGTGTTTTTCTAACGAAACCCA   | <i>pGADT7-ATX1</i>        |
| <i>ATX1</i> Forward        | CGAgtegcTTATTCTGCGGTCCAGTCTATTAGA     | <i>pGADT7-ATX1</i>        |
| <i>ATX1N</i> Forward       | GCTcatatgGCGTGTTTTTCTAACGAAACCCAG     | <i>pGADT7-ATX1N</i>       |
| <i>ATX1N</i> Reverse       | GCGgaattcACTATTAGCCATATCGGAATCAACAG   | <i>pGADT7-ATX1N</i>       |
| <i>ATX1C</i> Forward       | GTGgccatgGATTCCGATATGGCTAATAGTACAGA   | <i>pGADT7-ATX1C</i>       |
| <i>ATX1C</i> Reverse       | GTGgccatgGTTCTGCGGTCCAGTCTATTAGATCACA | <i>pGADT7-ATX1C</i>       |
| <i>ATX1DH</i> Forward      | GTGcatatgGATTCCGATATGGCTAATAGTACAGA   | <i>pGADT7-ATX1DH</i>      |
| <i>ATX1DH</i> Reverse      | AAAgcgccgcAGTTGATGTTTGTCGATG          | <i>pGADT7-ATX1DH</i>      |
| <i>ATX1SET+Win</i> Forward | CAGgaattcGAGAATGACATGTCAGTGGAGGGT     | <i>pGADT7-ATX1SET+Win</i> |
| <i>ATX1SET+Win</i> Reverse | GTGGCCATGGTTCTGCGGTCCAGTCTATTAGATCACA | <i>pGADT7-ATX1SET+Win</i> |
| <i>Win</i> Forward         | CAGgaattcGAGAATGACATGTCAGTGGAGGGT     | <i>pGADT7- Win</i>        |
| <i>Win</i> Reverse         | GAGCACAGCCAGATGGATTA                  | <i>pGADT7- Win</i>        |
| <i>ATX1SET</i> Forward     | GCTcatatgAATACTCCAAGCAACATTCTTTC      | <i>pGADT7-ATX1SET</i>     |
| <i>ATX1SET</i> Reverse     | TTCTGCGGTCCAGTCTATTAGATCACAACG        | <i>pGADT7-ATX1SET</i>     |
| <i>RbBp5</i> Forward       | ATGggatccGTATGAACGCTCCGATCATAGATCCATG | <i>pGBDT7-RbBp5</i>       |
| <i>RbBp5</i> Reverse       | GACggatccATAATATGCATCATCATCATCACC A   | <i>pGBDT7-RbBp5</i>       |
| <i>Ash2</i> Forward        | GCTgaattcATGGAGTCTCTTCAATCAAATTCCA    | <i>pGBDT7-Ash2</i>        |
| <i>Ash2</i> Reverse        | GCTgaattcACTCTTCATATCCTCAGAACCATTAG   | <i>pGBDT7-Ash2</i>        |
| <i>WDR5</i> Forward        | TAGagatctATGGCAGAGGAAATTCCAGCAACA     | <i>pET28a-WDR5</i>        |
| <i>WDR5</i> Reverse        | TGCagatctTTATTCTTTCTTCTGTGTCCAAATCCT  | <i>pET28a-WDR5</i>        |
| <i>ATX1N</i> Forward       | GCTgaattcATGGCGTGTTTTTCTAACGAAACCCAG  | <i>GST-ATX1N</i>          |
| <i>ATX1N</i> Reverse       | GCGgaattcACTATTAGCCATATCGGAATCAACAG   | <i>GST-ATX1N</i>          |
| <i>ATX1C</i> Forward       | TGATTCCGATATGGCTAATAGTACAGA           | <i>GST-ATX1C</i>          |
| <i>ATX1C</i> Reverse       | GTGGCCATGGTTCTGCGGTCCAGTCTATTAGATCACA | <i>GST-ATX1C</i>          |
| <i>ATX1DH</i> Forward      | TGATTCCGATATGGCTAATAGTACAGA           | <i>GST-ATX1DH</i>         |
| <i>ATX1DH</i> Reverse      | AAAgcgccgcAGTTGATGTTTGTCGATG          | <i>GST-ATX1DH</i>         |
| <i>ATX1SET+Win</i> Forward | CAGgaattcGAGAATGACATGTCAGTGGAGGGT     | <i>GST-ATX1SET+Win</i>    |
| <i>ATX1SET+Win</i> Reverse | GTGGCCATGGTTCTGCGGTCCAGTCTATTAGATCACA | <i>GST-ATX1SET+Win</i>    |
| <i>Win</i> Forward         | CAGgaattcGAGAATGACATGTCAGTGGAGGGT     | <i>GST- Win</i>           |
| <i>Win</i> Reverse         | GAGCACAGCCAGATGGATTA                  | <i>GST- Win</i>           |

|                         |                                           |                     |
|-------------------------|-------------------------------------------|---------------------|
| <i>ATX1 SET</i> Forward | CACg gatccAAGGTGTCACAGATGAA               | <i>GST-ATX1 SET</i> |
| <i>ATX1 SET</i> Reverse | GTGGCCATGGTTCTGCGGTCCAGTCTATTAGATC<br>ACA | <i>GST-ATX1 SET</i> |
| <i>WDR</i> Forward      | GAagatctacgctgGTACGCTTCTCTTAAAAACCCAGC    | <i>WDR5-RNAi</i>    |
| <i>WDR</i> Reverse      | CGg gatccgcgcgcCTGCATTAAGTCATCACAAGTAGA   | <i>WDR5-RNAi</i>    |
| <i>Ash2</i> Forward     | CACCGAGGAGTTGTTGAAGGAGCTTGGT              | <i>Ash2-RNAi</i>    |
| <i>Ash2</i> Reverse     | TCACCTTCCTTGTACCCTTCCTCA                  | <i>Ash2-RNAi</i>    |
| <i>RbBp5</i> Forward    | CACCTTGCTTTGGTTTCTGCGTCTGGTG              | <i>RbBp5-RNAi</i>   |
| <i>RbBp5</i> Reverse    | CCACTGAAACAAGGCGCTTCCAA                   | <i>RbBp5-RNAi</i>   |
| <i>WDR</i> Forward      | CACCATGGCAGAGGAAATCCAGCAACA               | <i>TAP-WDR5</i>     |
| <i>WDR</i> Reverse      | TATTCTTTCTTCTGTGTCCAAATCCT                | <i>TAP-WDR5</i>     |
