# Supplementary material for: ATX1-Generated H3K4me3 Is Required for Efficient Elongation of Transcription, Not Initiation, at ATX1-Regulated Genes
Source: PubMed Central journal article supplement (PMC3527332; doi:10.1371/journal.pgen.1003111), 2012-12-20
Supplement: pgen.1003111.s007.pdf [file pgen.1003111.s007.pdf]

## **SUPPORTING INFORMATION**

### **Interaction between ATX1 and AtWDR5a; Identification of the ATX1-Win AtWDR5-binding domain**

Whether AtWDR5 could bind ATX1 preferentially from the multitude of proteins present in total cellular extracts was determined first. A TAP-tagged AtWDR5 fusion protein was used as bait in the *in vitro* affinity-binding assay. The presence of ATX1 in the TAP-AtWDR5-bound protein fraction was detected by Western blot analysis with antiATX1-specific antibodies (Figure S2A) and the identities of the multiple-size fragments recognized by the antibody were confirmed by mass spectroscopy (Figure S3A-C). Detailed inspection revealed that all ATX1-related fragments retained on the AtWDR5 column contained the ATX1-SET domain plus upstream regions of a varying length. The smallest ATX1 degradation fragment bound by AtWDR5 contained an upstream region similar to the Win (WDR5-interacting) peptide of MLL1 [1-3] (Figure S3D).

To confirm this peptide was responsible for the interaction, a panel of ATX1 deletions was tested for their ability to bind AtWDR5 in the Y2-H binding system. The results showed that all ATX1 protein fragments able to interact with AtWDR5 contained the ATX1-Win peptide and that the ATX1-Win peptide alone could bind to AtWDR5 (Figure S2B, C), confirming this is the primary ATX1- AtWDR5 interaction region. The interactions were further confirmed by *in vitro* pull-down assays testing AtWDR5 and ATX1 derivatives as both baits and as substrates (Figure S2D).

### **Interactions between ATX1 and AtASH2 or AtRbPB5**

The ability of ATX1 to interact with the other two complex subunits was tested in the Y2-H binding system under the same conditions used for the AtWDR5 assays. Lack of detectable growth suggested ATX1 did not bind directly to either AtASH2 or AtRbBP5 in the Y2-H binding system (Figure 2C). The results suggested that ATX1 integrates into the AtCOMPASS exclusively through the Win-mediated binding to AtWDR5.

Collectively, the results determined that AtWDR5 binds ATX1 within the cellular context. Interaction is via the ATX1-Win domain, a functional counterpart of the Win domain in MLL1 [1-3]. The significance of this result is that similarity of the interaction of the catalytic subunit with the rest of the complex implies functional similarity between the animal and plant complexes.

## **REFERENCES**

1. Patel A, Dharmarajan V, Cosgrove MS (2008) Structure of WDR5 bound to mixed lineage leukemia protein-1 peptide. *J Biol Chem* 283: 32158-3261.
2. Song JJ, Kingston RE (2008) WDR5 interacts with mixed lineage leukemia (MLL) protein via the histone H3-binding pocket. *J Biol Chem* 283: 35258-35264.
3. Karatas H, Townsend EC, Bernard D, Dou Y, Wang S (2010) Analysis of the binding of mixed lineage leukemia 1 (MLL1) and histone 3 peptides to WD repeat domain 5 (WDR5) for the design of inhibitors of the MLL1-WDR5 interaction. *J Med Chem* 53: 5179-5185.
